# Supplementary material for: Cyclodipeptides from Pseudomonas aeruginosa modulate the maize (Zea mays L.) root system and promote S6 ribosomal protein kinase activation
Source: PeerJ. 2019 Aug 28;7:e7494. doi: 10.7717/peerj.7494 (PMC6717507; doi:10.7717/peerj.7494)
Supplement: Supplemental Information 9 — Each sheet contains the raw data for the indicated figure part. [file peerj-07-7494-s009.xlsx]

## Sheet: Fig 2A
Control	AIA	0.5 uM	1 uM	10 uM	20 uM	50 uM
10.2	11.2	11.2	11.6	11.5	13.6	11.7
10.1	11.2	11.1	11.4	11.5	9.5	11.5
10	10.5	11	11.3	7.6	13	11.3
10	10.4	11	9.5	7.8	12.7	11
9.8	10.3	10.9	10.7	10.8	10.8	10.5
9.8	10	10.4	10.6	10.3	7.9	10.5
9.1	8.8	10.2	10.5	8.1	9.1	10.1
9	8.7	10.1	10.4	7.7	10.4	10
9	10.4	9.4	10.4	9.8	8	9.8
8.8	9	9.2	9.7	8.6	10.4	9.7
8.6	9.8	8.8	9.5	10.6	10.6	9.5
8.6	12.1	8.8	9.3	8	7.9	9
8.4	9.3	7.9	9.3	7.9	10	9
8.2	11.4	7.8	9.1	9.4	9.8	9
8.2	8.5	7.5	8.9	10.2	9.6	8.8
8.1	7.3	7.1	8.8	8.4	10	8.7
8	8.2	7	8.8	10.4	9.2	8.6
7.9	10.2	11.3	8.2	7.9	8.9	8
7.9	7.7	7.2	8.2	13.2	8.9	7.5
11.2	10.9	10.5	10.8	8.6	10.6	7.9
7.6	10.3	8	8	9.2	8.7	9.6
7.4	8.6	9.8	10.6	10.9	9.6	8.4
9.5	11.8	7	9.3	9.3	8.5	8.3
9.3	11.3	11.3	9.2	9.9	8.2	9.6

## Sheet: Fig 2B
Control	AIA	0.5 uM	1 uM	10 uM	20 uM	50 uM
5.5	5.8	5.6	5.5	5.5	5	5.5
5.5	5	5.5	4.7	5.3	5	4.7
5.3	4.3	5	4.4	5.3	5	4.3
5	4	3.3	3.3	5	4.7	4
4.5	4	5.1	4.2	4.5	4.6	4
4.5	3.3	4	4.1	4.3	4.5	4
2.5	3.1	4.5	4	4.2	4.5	4
4	4.5	4.4	3.1	4.2	4.2	4
4	2.5	3.4	4	3.8	4	3.8
3.7	4.8	4	4	3.6	3.9	3.6
3	3.2	4	3.9	3.5	3.8	3.5
2.6	5.3	4	3.7	3.2	3.5	3.5
3.5	4.5	3.7	3.5	3	3.5	3.5
3.5	2.9	3.6	2.6	4.6	3.5	3.5
3.1	3.6	3.5	3.5	3.8	3.5	3.4
3.3	4.2	3	2.5	4.7	3.5	3.2
3.2	4.3	3.5	3.3	2.8	3.3	3
3	2.8	2.5	2.7	3	3.2	3
3	4.3	5.2	3	3.3	3.2	3
3	3.5	3.5	3.7	4.7	3	2.6
3.1	4.6	3.7	2.9	5.1	4.2	2.6
2.4	3.3	2.7	2.8	4.8	3.7	2.5
2.9	3.7	4.5	3.8	3.8	2.9	2.5
2.7	3.1	4.6	4.1	4	5	2.5

## Sheet: Fig 2C
Control	AIA	0.5 uM	1 uM	10 uM	20 uM	50 uM
11	14	11	13	12	18	10
9	14	10	11	10	18	10
9	10	8	11	10	18	9
8	10	10	10	9	17	8
8	6	10	9	8	12	9
8	13	8	5	9	11	4
7	8	9	9	6	10	5
7	7	11	7	6	10	5
6	4	7	4	8	10	9
6	7	6	6	4	9	9
6	6	8	6	8	9	8
6	9	10	8	8	9	10
5	5	4	5	9	9	9
5	5	4	6	8	8	8
5	6	6	8	8	8	7
4	8	9	7	8	8	8
4	4	7	4	7	7	6
4	5	4	8	7	6	4
4	5	6	8	10	6	6
3	9	8	10	5	5	4
3	9	10	7	5	5	12
3	11	7	7	9	5	9
3	12	5	6	4	5	8
3	12	4	4	4	5	4

## Sheet: Fig 2D
Control	AIA	0.5 uM	1 uM	10 uM	20 uM	50 uM
9	13	10	13	11	13	12
9	12	10	13	11	13	12
8	12	9	12	9	13	11
8	10	8	11	9	12	10
8	9	8	11	9	12	10
8	8	8	9	8	12	9
8	9	9	8	10	11	9
8	8	8	8	9	10	9
8	8	8	7	9	10	8
7	8	8	7	8	9	7
7	7	8	7	8	9	7
7	7	7	7	8	9	6
6	7	7	7	7	8	6
6	7	7	6	7	8	6
6	7	7	6	7	8	6
6	6	7	6	6	7	6
6	6	6	6	5	7	5
5	6	6	6	5	7	5
5	6	6	6	5	6	5
5	6	5	5	5	6	5
4	5	5	5	4	6	5
4	5	4	5	4	5	4
4	4	4	4	4	4	4
4	4	4	4	4	4	4

## Sheet: Fig 2E
Control	AIA	0.5 μM	1 μM	10 μM	20 μM	50 uM
4	4	5	4	5	2	4
4	4	4	4	3	3	3
3	4	4	3	3	2	3
3	3	4	2	3	2	3
3	2	4	1	3	2	2
2	1	3	1	2	2	1
2	2	3	1	2	2	1
2	3	3	1	4	2	2
4	1	2	1	2	2	1
1	2	1	2	1	1	1
1	2	1	2	1	1	1
2	2	4	4	4	3	4
3	3	3	3	1	2	3
2	2	2	2	2	2	2
1	1	2	1	1	1	1
2	2	2	1	2	1	1
2	3	4	2	4	2	2
2	1	3	1	3	2	2
2	2	2	2	2	2	2
1	2	1	1	1	1	1
2	2	2	1	1	1	2
2	2	3	3	3	2	2
3	2	3	1	2	3	2
2	1	1	1	2	1	1
