# Supplementary material for: Cyclodipeptides from Pseudomonas aeruginosa modulate the maize (Zea mays L.) root system and promote S6 ribosomal protein kinase activation
Source: PeerJ. 2019 Aug 28;7:e7494. doi: 10.7717/peerj.7494 (PMC6717507; doi:10.7717/peerj.7494)
Supplement: Supplemental Information 10 — Each sheet contains the raw data for the indicated figure part. [file peerj-07-7494-s010.xlsx]

## Sheet: Fig 4A
Control	CDPs 20uM
61	53
51	63.5
52	54
48	57
51	59
51	47
45	48
38	48
44	52.5
40.5	51.5
41	42
42.5	45.5
39	46.5
20	47.5
32	49.5
41.5

## Sheet: Fig 4B
Control	CDPs 20uM
341.004	677.033
571.646	873.153
707.411	711.332
576.425	668.872
557.705	805.378
492.407	857.802
1284.32	511.83
410.526	825.618
1272.79	1109.57
426.494	1060.02
746.568	1203.84
719.976	902.685
952.507	631.444
433.616	1317.21
187.66	1914.25
490.816	1299.36

## Sheet: Fig 4C
Control	CDPs 20uM
1697	1165
4056	950
2686	4317
5826	3840
1702	7592
3784	7738
5055	6784
3696	2956
2180	9482
1577	9178
3099	9396

## Sheet: Fig 4D
Control	CDPs 20uM
0.6614	0.4882
0.492	0.4878
0.5023	0.5006
0.5988	0.6387
0.6143	0.6297
0.6466	0.5453
0.2986	0.597
0.5206	0.3733
0.3381	0.4006
0.3979	0.3653
0.4574	0.373
0.4392	0.3947
0.3385	0.5281
0.5774	0.432
0.6819	0.3669
0.4791	0.396

## Sheet: Fig 4E
Control	CDPs 20uM
1.617	2.004
0.899	1.433
0.874	0.904
1.143	1.399
0.53	1.111
1.227	1.316
1.091	1.104
0.857	1.383
1.135	1.931
0.685	2.023
0.885	1.601

## Sheet: Fig 4F
C	CDPs 20uM
107.625	159.326
100.026	146.96
120.476	96.0027
67.1435	96.8189
135.19	139.651
53.3116	121.641
107.29	141.072
99.3341	111.926
101.294	104.761
78.6567	178.779
40.2039	220.617
73.8708	161.662
