# Supplementary material for: Cyclodipeptides from Pseudomonas aeruginosa modulate the maize (Zea mays L.) root system and promote S6 ribosomal protein kinase activation
Source: PeerJ. 2019 Aug 28;7:e7494. doi: 10.7717/peerj.7494 (PMC6717507; doi:10.7717/peerj.7494)
Supplement: Supplemental Information 11 — The data used for Fig. 5B, normalizing the densitometric units to 1.0 for the control plants. [file peerj-07-7494-s011.xlsx]

## Sheet: Fig 5B
Control	AIA 12 µM	CDPs 0.5 µM	CDPs 1 µM	CDPs 10 µM	CDPs 20µM	CDPs 50 µM
1	2.03021	2.2824	1.61348	0.990963	4.07951	2.20097
1	1.5652	1.57997	1.5309	3.2414	3.71073	3.40143
